# Supplementary material for: Functional Analysis of β-Carotene Oxygenase 2 (BCO2) Gene in Yesso Scallop (Patinopecten yessoensis)
Source: MDPI journal article supplement (doi:10.3390/ijms25073947), 2024-04-02
Supplement: s1 [file s1]

Table S1. Comparison of the identities of BCO2 homologs between *P. yessoensis* and other organisms.

| Species                        | Full Protein (%) |
|--------------------------------|------------------|
| <i>Patinopecten yessoensis</i> | 100              |
| <i>Homo sapiens</i>            | 39.49            |
| <i>Mus musculus</i>            | 39.73            |
| <i>Gallus gallus</i>           | 38.48            |
| <i>Xenopus tropicalis</i>      | 39.58            |
| <i>Danio rerio</i>             | 40.65            |
| <i>Argopecten irradians</i>    | 73.64            |
| <i>Pecten maximus</i>          | 78.58            |
| <i>Scapharca broughtonii</i>   | 50.65            |
| <i>Caenorhabditis elegans</i>  | 31.62            |
